# Supplementary material
Source: PubMed Central journal article supplement (PMC5521871)
Supplement: DB161285SupplementaryData.pdf [file DB161285SupplementaryData.pdf]

## SUPPLEMENTARY DATA

### **Radiomanganese PET Detects Changes in Functional $\beta$ -cell Mass in Mouse Models of Diabetes**

Reinier Hernandez,<sup>1</sup> Stephen A. Graves,<sup>1</sup> Trillian Gregg,<sup>2,3</sup> Halena R. VanDeusen,<sup>2</sup> Rachel J. Fenske,<sup>2</sup> Haley N. Wienkes,<sup>2</sup> Christopher G. England,<sup>1</sup> Hector F. Valdovinos,<sup>1</sup> Justin J. Jeffery,<sup>4</sup> Todd. E. Barnhart,<sup>1</sup> Gregory W. Severin,<sup>5,6</sup> Robert J. Nickles,<sup>1</sup> Michelle E. Kimple,<sup>2,7</sup> Matthew J. Merrins,<sup>2,7,8</sup> and Weibo Cai<sup>1,4,9</sup>

<sup>1</sup>Department of Medical Physics, University of Wisconsin-Madison, Madison, WI, USA,

<sup>2</sup>Department of Medicine, Division of Endocrinology, Diabetes & Metabolism, University of Wisconsin-Madison, Madison, WI, USA, <sup>3</sup>Program in Biophysics, University of Wisconsin-Madison, Madison, WI, USA, <sup>4</sup>Carbone Cancer Center, University of Wisconsin-Madison, Madison, WI, USA, <sup>5</sup>Center for Nuclear Technologies, Technical University of Denmark, 4000 Roskilde, Denmark, <sup>6</sup>Department of Chemistry, Michigan State University, East Lansing, MI, USA, <sup>7</sup>William S. Middleton Memorial Veterans Hospital, Madison, WI, USA, <sup>8</sup>Department of Biomolecular Chemistry, University of Wisconsin-Madison, Madison, WI, USA, <sup>9</sup>Department of Radiology, University of Wisconsin-Madison, Madison, WI, USA.

Corresponding authors: Matthew J. Merrins, [merrins@wisc.edu](mailto:merrins@wisc.edu), and Weibo Cai, [wcai@uwhealth.org](mailto:wcai@uwhealth.org).

Short title: <sup>52</sup>Mn<sup>2+</sup>-PET imaging of functional  $\beta$ -cell mass in vivo

Authorship note: R.H. and S.A.G. contributed equally to this work.

Conflict of interest: The authors declare that no conflict of interest exists.

## SUPPLEMENTARY DATA

### Mice

All animal experiments were approved by the Institutional Animal Care and Use Committees of the University of Wisconsin-Madison and the William S. Middleton Memorial Veterans Hospital. Male ICR (Envigo) and C57BL/6J wildtype and *ob/ob* mice (The Jackson Laboratory) were employed in this work. All mice were approximately ten weeks of age at the time of the experiments. Mice had access to food and water *ad libitum*, except under fasting condition when access to food was restricted for 6-12 hours.

### $^{52}\text{Mn}^{2+}$ Production

$^{52}\text{Mn}^{2+}$  was produced as previously described (1). Production yields of up to 5.92 MBq/ $\mu\text{Ah}$  (355 MBq/h @ 60  $\mu\text{A}$ ) were achieved using a chromium pellet pressed into a silver disc substrate.  $^{52}\text{Mn}^{2+}$  was eluted in <1mL of 0.01 M NaOAc buffer (pH ~6.5) from a ~150 mg AG 1 $\times$ 8 column which had been conditioned with ethanol. As previously described (2), thin layer chromatographs confirmed the  $\text{Mn}^{2+}$  oxidation state following elution. End of bombardment radionuclidic purity was measured to be >99.5% by efficiency-calibrated high-purity germanium (HPGe) gamma spectrometry measurements. The only radionuclidic impurity observed was <0.5% of  $^{54}\text{Mn}$  ( $t_{1/2}$ = 312.1 d), which does not decay by positron emission.

### Islet Isolation

Mouse pancreatic islets were isolated by collagenase digestion as previously reported in (3). Briefly, mice were sacrificed via  $\text{CO}_2$  asphyxiation followed by cervical dislocation. The common bile duct was perfused with 4 mL of an ice-cold solution containing type XI collagenase (0.5 mg/mL; Sigma Aldrich) and bovine serum albumin (BSA; 0.2 mg/mL; Sigma Aldrich) in Hank's Balanced Salt Solution (HBSS; Invitrogen). After inflation, the pancreas was removed to a glass vial containing 5 mL of collagenase solution, and incubated in a shaking water bath at 37°C for approximately 20 min. The digests were centrifuged at 50g for 2 min and islet pellets were washed three times with 30 mL ice-cold HBSS/BSA. The pellet was re-suspended and the islets were handpicked into 35 mm petri dishes. Following isolation, islets were placed in RPMI1640 media supplemented with penicillin (100 U/mL; Invitrogen), streptomycin (100  $\mu\text{g/mL}$ ; Invitrogen), and 10% (wt/vol) FBS (Sigma) and incubated overnight at 37°C in a 5%  $\text{CO}_2$  atmosphere.

## SUPPLEMENTARY DATA

### Pharmacological Disruption of $^{52}\text{Mn}^{2+}$ Uptake in Isolated Islets

Batches of 50 islets were transferred into 0.45  $\mu\text{m}$ -filtered 1 mL centrifuge vials (Thermo Fisher Scientific), and incubated with 500  $\mu\text{L}$  of Krebs-Ringer buffer (KRB: 118 mM NaCl, 5.4 mM KCl, 2.4 mM  $\text{CaCl}_2$ , 1.2 mM  $\text{MgSO}_4$ , 1 mM  $\text{KH}_2\text{PO}_3$ , 20 mM HEPES; pH 7.4) containing 1 mM glucose for 30 min at 37°C. After removing the supernatant by centrifugation at 50g for 5 min, 250  $\mu\text{L}$  of KRB containing 16.7 mM glucose, diazoxide (50  $\mu\text{M}$ ; Tocris Biosciences), or tolbutamide (250  $\mu\text{M}$ ; Selleckchem) were added, and the vials were spiked with 370 kBq (10  $\mu\text{Ci}$ ) of  $^{52}\text{Mn}^{2+}$ . After 15 min of incubation, the islets were washed three times with KRB.  $^{52}\text{Mn}^{2+}$  radioactivity in the islet pellets was quantified using an automated gamma counter (Perkin Elmer).

### Ex vivo $^{52}\text{Mn}^{2+}$ Biodistribution Analysis

*Ex vivo* biodistribution studies were performed in all groups of mice to validate the results of  $^{52}\text{Mn}^{2+}$ -PET imaging and obtain a more complete profile of tissue  $^{52}\text{Mn}^{2+}$  uptake. Following the last imaging time point, mice were euthanized by CO<sub>2</sub> asphyxiation and 15 organs of interest were removed, wet-weighted, and counted in an automated gamma-counter (Wizard 2480, Perkin Elmer). The tissue uptake of  $^{52}\text{Mn}^{2+}$  was reported as SUV (mean  $\pm$  S.D.).

### Measurement of $\beta$ -cell Mass

Similar as our previous report (4), mice were euthanized under anesthesia with CO<sub>2</sub> followed by cervical dislocation. The pancreas was immediately dissected, weighed, and fixed in 10% formalin on ice for 30 minutes. Pancreata were then washed in PBS and transferred through a series of solutions, beginning with 30% sucrose in PBS, 1:1 30% sucrose:OCT, and OCT before cryopreservation in OCT and storage at -80°C. 10-micron serial sections were cut on positively charged slides, with 9 sections per stop position (3/slide) and two stop positions per pancreas separated by at least 200 microns. For each pancreas, one slide per position was post-fixed, quenched of peroxidase activity with 3% H<sub>2</sub>O<sub>2</sub>, and immunohistochemically labeled using guinea pig anti-insulin primary antibody (Dako A056401-2), diluted 1:500 in antibody diluent, and co-stained with hematoxylin (Sigma, GHS280). Slides were imaged using an automated pan-and-stich microscope at 10 $\times$  (Evos).  $\beta$ -cell fractional area was determined by quantifying the percent of insulin-positive pancreas area as a total of the full pancreas area for each section, followed by averaging of 2 distinct sections per mouse. Images were analyzed using ImageJ (64-bit) software (National Institutes of Health, Bethesda, MD) with shading correction.  $\beta$ -cell mass was calculated by multiplying  $\beta$ -cell fractional area by the pancreatic wet weight.

### Islet $\text{Ca}^{2+}$ Imaging

For measurements of cytosolic  $\text{Ca}^{2+}$ , islets were pre-incubated in 2.5  $\mu\text{M}$  FuraRed (Molecular Probes) for 45 min at 37°C. Islets were then placed in an RC-41LP glass-bottomed chamber mounted in a QE-1 platform (Warner Instruments) on a Nikon Ti-Eclipse inverted microscope equipped with a 20 $\times$ /0.75NA SuperFluor objective (Nikon Instruments). The chamber was perfused with standard external solution with glucose (in mM: 135 NaCl, 4.8 KCl, 5  $\text{CaCl}_2$ , 1.2  $\text{MgCl}_2$ , 20 HEPES; pH 7.35). The flow rate was 0.5 ml/min and temperature was maintained at 33°C using inline solution and chamber heaters (Warner Instruments). Excitation was provided by a SOLA SEII 365 (Lumencor) set to 10% output. Excitation (430/20 nm and 500/20 nm) and emission (630/70 nm) filters (ET type, Chroma Technology Corporation) were used in combination with an FF444/521/608-Di01 dichroic (Semrock). Fluorescence emission was collected with a Hamamatsu ORCA-Flash4.0 V2 Digital CMOS camera at 0.125 Hz. A

## SUPPLEMENTARY DATA

single region of interest was used to quantify the average response of each islet as the excitation ratio (R430/500) using Nikon Elements and MathWorks MATLAB software as in (3).

### **Statistics**

A minimum sample size of three ( $n=3$ ) was used in all *in vitro* and *in vivo* experiments. The uptake of  $^{52}\text{Mn}^{2+}$  in the different tissues was reported as SUV (mean  $\pm$  S.D.) and the differences between groups were evaluated for significance using a two-tailed Student's t-test. Differences were considered statistically significant at  $P < 0.05$ .

SUPPLEMENTARY DATA

**Supplementary Figure S1** Three-dimensional rendering of the pancreas and kidneys PET signal in ICR mice injected a rapid IV  $^{52}\text{Mn}^{2+}$  bolus. Three different view angles are presented showing the separation between pancreas and the left kidney. The animal subject shown here is the same displayed in Figure 1 of the main text.

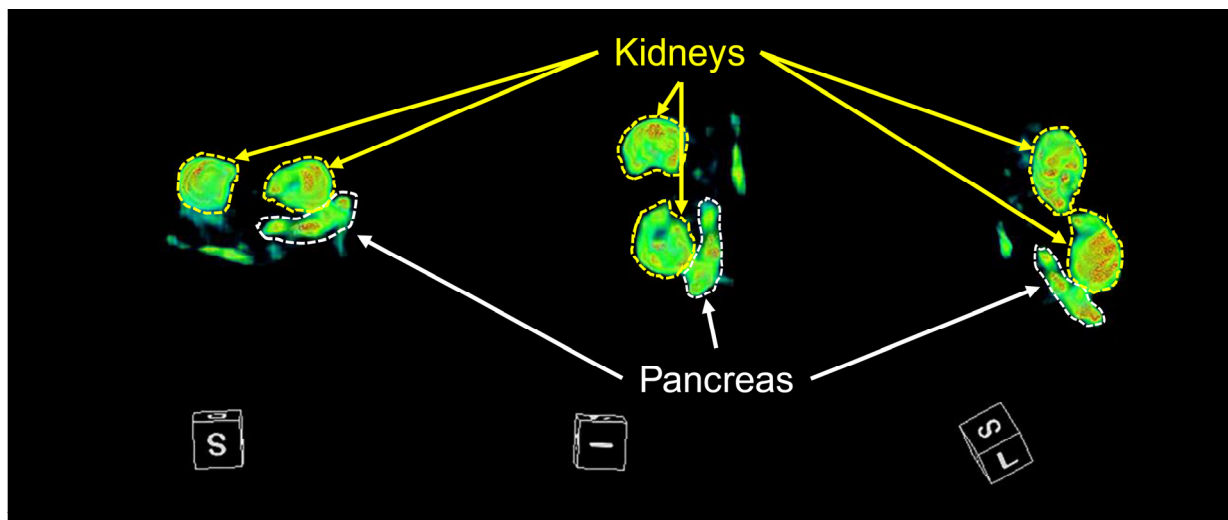

SUPPLEMENTARY DATA

**Supplementary Figure S2.** Impact of isoflurane on pancreatic uptake of  $^{52}\text{Mn}^{2+}$  in mice. ICR mice (3-6 per group) received either an intravenous bolus of  $^{52}\text{Mn}^{2+}$ , or an intraperitoneal injection of glucose (1 mg/kg) followed by an intravenous infusion of  $^{52}\text{Mn}^{2+}$  from 5 to 15 minutes following glucose administration. A subset of these treatments was anesthetized with 2% isoflurane during injections, whereas the rest of the mice were not anesthetized. One hour following  $^{52}\text{Mn}^{2+}$  administration, mice were euthanized and *ex vivo* biodistribution studies were performed via gamma counting. Pancreatic uptake of  $^{52}\text{Mn}^{2+}$  was found to be significantly lower in both groups under isoflurane anesthesia, when compared to non-anesthetized controls, suggesting that isoflurane prevents voltage-dependent calcium channel (VDCC) mediated  $^{52}\text{Mn}^{2+}$  influx.

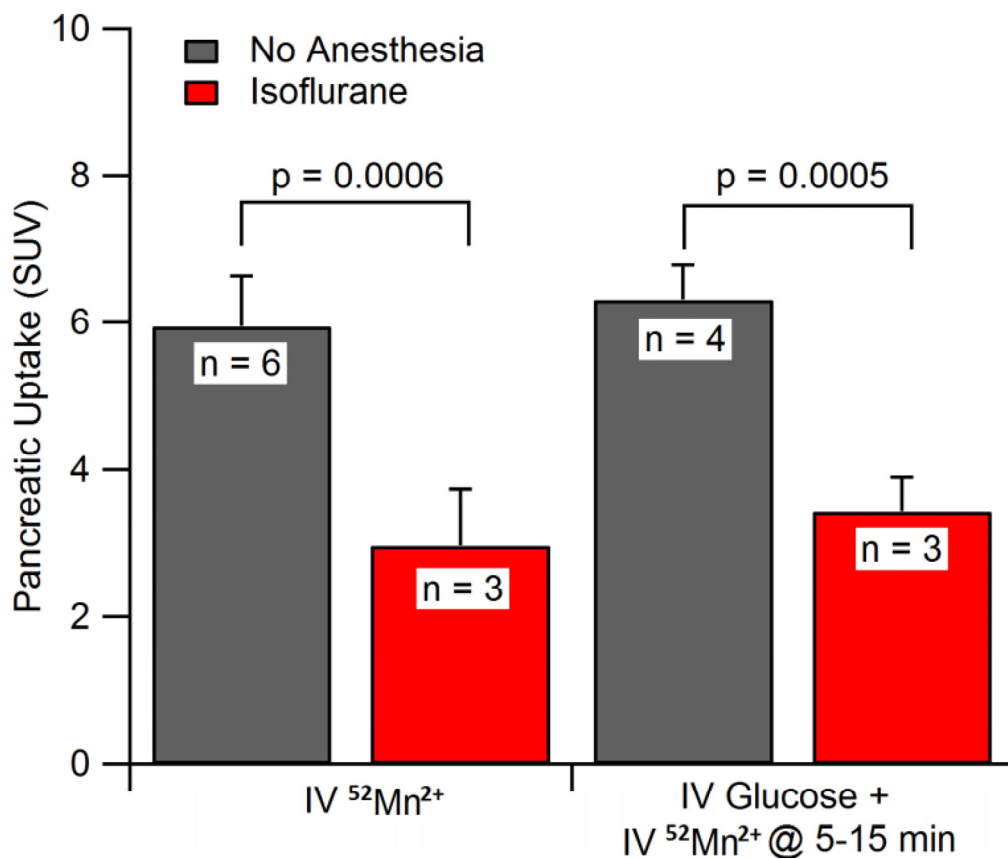

SUPPLEMENTARY DATA

**Supplementary Figure S3** *Ex vivo* biodistribution of lean (C57BL/6J) and obese (ob/ob) mice, one-hour post injection of  $^{52}\text{Mn}^{2+}$ . Significantly higher  $^{52}\text{Mn}^{2+}$  uptake can be noted in obese mice compared to the lean controls ( $***P < 0.0001$ ;  $n=3$ ).

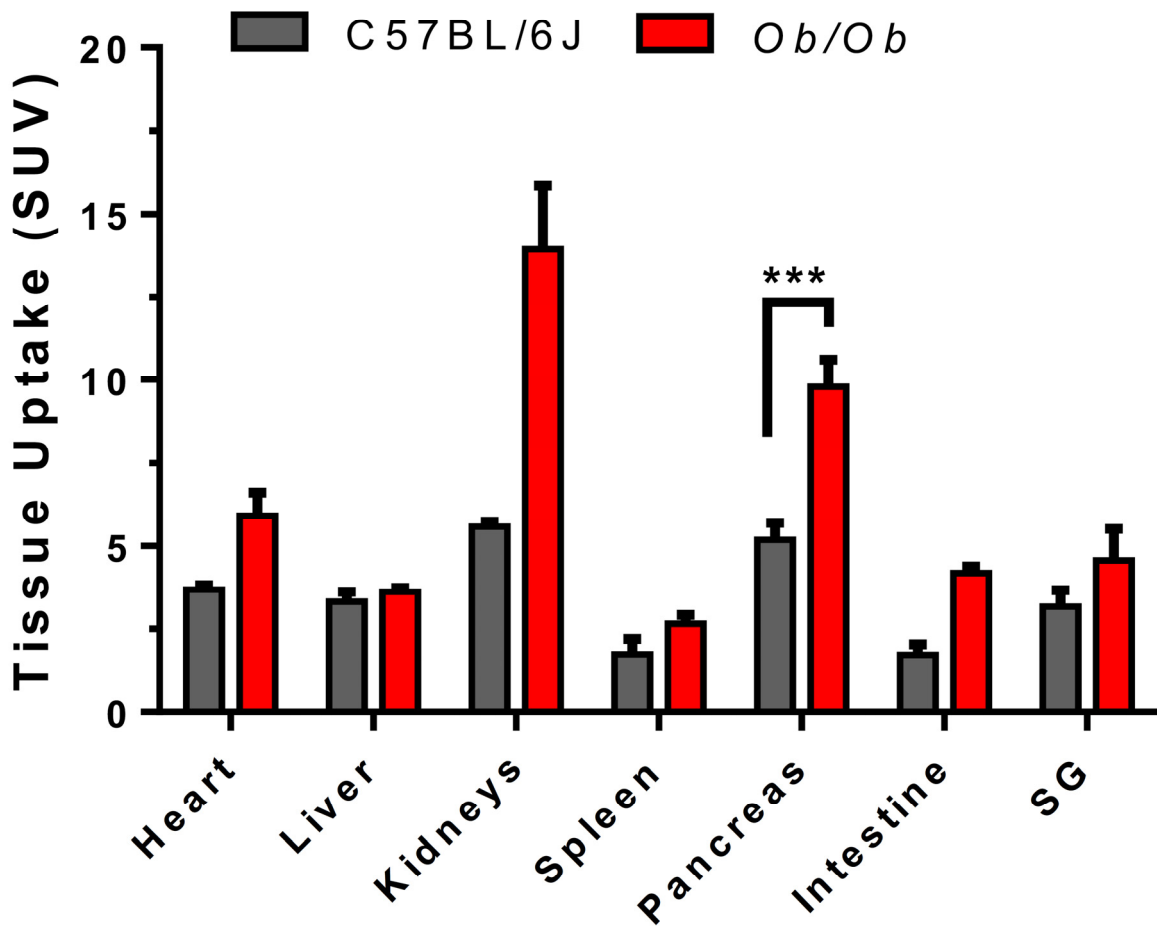

SUPPLEMENTARY DATA

**Supplementary Table S1.** Quantitative results of longitudinal PET imaging studies in ICR mice administered a  $^{52}\text{Mn}^{2+}$  intravenous bolus (n = 4)

| Time (days) | Organ/tissue uptake |             |             |             |             |             |
|-------------|---------------------|-------------|-------------|-------------|-------------|-------------|
|             | Heart/blood         | Liver       | Kidneys     | Muscle      | Pancreas    | S Gland     |
| 0.042       | 2.11 ± 0.20         | 3.27 ± 0.34 | 5.13 ± 0.02 | 0.38 ± 0.03 | 5.13 ± 0.37 | 2.30 ± 0.26 |
| 0.125       | 1.88 ± 0.19         | 3.37 ± 0.47 | 5.21 ± 0.32 | 0.38 ± 0.02 | 5.11 ± 0.50 | 2.53 ± 0.44 |
| 0.5         | 1.21 ± 0.16         | 3.51 ± 0.29 | 4.90 ± 0.19 | 0.35 ± 0.05 | 4.89 ± 0.17 | 2.77 ± 0.19 |
| 1           | 0.93 ± 0.11         | 3.15 ± 0.28 | 4.59 ± 0.27 | 0.33 ± 0.03 | 4.84 ± 0.18 | 2.69 ± 0.05 |
| 3           | 0.80 ± 0.08         | 1.94 ± 0.17 | 3.32 ± 0.14 | 0.27 ± 0.05 | 4.40 ± 0.34 | 2.85 ± 0.09 |
| 5           | 0.72 ± 0.05         | 1.49 ± 0.05 | 2.60 ± 0.03 | 0.26 ± 0.03 | 3.65 ± 0.37 | 3.18 ± 0.33 |
| 7           | 0.69 ± 0.00         | 1.08 ± 0.10 | 1.96 ± 0.21 | 0.20 ± 0.02 | 2.98 ± 0.25 | 3.02 ± 0.13 |
| 9           | 0.64 ± 0.02         | 0.83 ± 0.06 | 1.56 ± 0.20 | 0.18 ± 0.02 | 2.26 ± 0.23 | 2.70 ± 0.10 |
| 11          | 0.58 ± 0.03         | 0.70 ± 0.02 | 1.28 ± 0.14 | 0.19 ± 0.01 | 1.80 ± 0.23 | 2.63 ± 0.15 |
| 13          | 0.54 ± 0.03         | 0.62 ± 0.01 | 1.13 ± 0.06 | 0.19 ± 0.01 | 1.65 ± 0.31 | 2.50 ± 0.08 |

Mean ± SD values are reported as standardized uptake value (SUV)



SUPPLEMENTARY DATA

**Supplementary Table S2.** *Ex vivo* biodistribution of  $^{52}\text{Mn}^{2+}$  at day 13 after intravenous administration in healthy ICR mice. n = 4.

| <b>Organ/tissue</b> | <b><math>^{52}\text{Mn}^{2+}</math> uptake<br/>(SUV)*</b> | <b><math>^{52}\text{Mn}^{2+}</math> uptake<br/>(%ID/g)*</b> |
|---------------------|-----------------------------------------------------------|-------------------------------------------------------------|
| <b>Blood</b>        | 0.01 ± 0.01                                               | 0.06 ± 0.02                                                 |
| <b>Skin</b>         | 0.16 ± 0.05                                               | 0.56 ± 0.18                                                 |
| <b>Muscle</b>       | 0.26 ± 0.04                                               | 0.93 ± 0.14                                                 |
| <b>Bone</b>         | 0.50 ± 0.09                                               | 1.78 ± 0.28                                                 |
| <b>Heart</b>        | 1.19 ± 0.08                                               | 4.25 ± 0.18                                                 |
| <b>Lung</b>         | 0.22 ± 0.06                                               | 0.80 ± 0.22                                                 |
| <b>Liver</b>        | 0.72 ± 0.04                                               | 2.57 ± 0.14                                                 |
| <b>Kidney</b>       | 1.85 ± 0.04                                               | 6.57 ± 0.23                                                 |
| <b>Spleen</b>       | 0.35 ± 0.10                                               | 1.23 ± 0.34                                                 |
| <b>Pancreas</b>     | 2.62 ± 0.44                                               | 9.30 ± 1.29                                                 |
| <b>Stomach</b>      | 0.76 ± 0.18                                               | 2.68 ± 0.61                                                 |
| <b>Intestine</b>    | 0.14 ± 0.02                                               | 0.49 ± 0.07                                                 |
| <b>Salivary</b>     | 2.84 ± 0.13                                               | 10.13 ± 0.38                                                |
| <b>Tail</b>         | 0.14 ± 0.01                                               | 0.54 ± 0.05                                                 |
| <b>Brain</b>        | 0.52 ± 0.01                                               | 1.87 ± 0.07                                                 |
| <b>*Mean ± SD</b>   |                                                           |                                                             |

SUPPLEMENTARY DATA

**Supplementary Table S3.** Quantitative results of PET imaging in ICR mice 1 h post administration of  $^{52}\text{Mn}^{2+}$  under various conditions to stimulate or inhibit insulin release.

| <b>Organs</b>             | <b>Baseline<br/>(n=3)</b> | <b>Diazoxide<br/>(n=3)</b> | <b>Nifedipine<br/>(n=3)</b> | <b>Glibenclamide<br/>(n=4)</b> | <b>STZ-diabetic<br/>(n=3)</b> |
|---------------------------|---------------------------|----------------------------|-----------------------------|--------------------------------|-------------------------------|
| <b>Heart/blood</b>        | 2.11 ± 0.20               | 2.58 ± 0.22                | 2.61 ± 0.30                 | 2.50 ± 0.60                    | 1.97 ± 0.50                   |
| <b>Liver</b>              | 3.27 ± 0.34               | 3.11 ± 0.50                | 2.06 ± 0.56                 | 3.20 ± 0.87                    | 2.89 ± 1.70                   |
| <b>Kidneys</b>            | 5.13 ± 0.02               | 4.66 ± 1.48                | 3.52 ± 0.43                 | 5.70 ± 1.35                    | 3.80 ± 0.78                   |
| <b>Muscle</b>             | 0.38 ± 0.03               | 0.40 ± 0.07                | 0.44 ± 0.07                 | 0.44 ± 0.04                    | 0.23 ± 0.06                   |
| <b>Pancreas</b>           | 5.13 ± 0.38               | 2.85 ± 0.92                | 2.36 ± 0.61                 | 6.47 ± 1.36                    | 2.04 ± 0.81                   |
| <b>Salivary<br/>Gland</b> | 2.30 ± 0.26               | 2.46 ± 0.97                | 2.15 ± 0.22                 | 2.25 ± 0.14                    | 1.51 ± 1.01                   |

Mean ± SD values are reported as standardized uptake value (SUV)

SUPPLEMENTARY DATA

**Supplementary Table S4.** One-hour post injection *ex vivo* biodistribution data in ICR mice administered  $^{52}\text{Mn}^{2+}$  under various conditions to stimulate or inhibit insulin release.

| <b>Organs</b>             | <b>Baseline<br/>(n=3)</b> | <b>Diazoxide<br/>(n=3)</b> | <b>Nifedipine<br/>(n=3)</b> | <b>Glibenclamide<br/>(n=4)</b> | <b>STZ diabetic<br/>(n=3)</b> |
|---------------------------|---------------------------|----------------------------|-----------------------------|--------------------------------|-------------------------------|
| <b>Heart</b>              | 4.01 ± 0.26               | 4.96 ± 0.46                | 5.42 ± 0.81                 | 5.29 ± 1.19                    | 1.97 ± 0.50                   |
| <b>Liver</b>              | 3.63 ± 0.13               | 3.17 ± 0.83                | 1.84 ± 0.45                 | 3.26 ± 0.70                    | 2.89 ± 1.70                   |
| <b>Kidneys</b>            | 8.12 ± 0.88               | 6.42 ± 2.67                | 4.55 ± 0.84                 | 8.10 ± 1.22                    | 3.80 ± 0.78                   |
| <b>Spleen</b>             | 1.74 ± 0.22               | 1.75 ± 0.47                | 0.52 ± 0.13                 | 1.68 ± 0.40                    | 0.23 ± 0.06                   |
| <b>Pancreas</b>           | 6.31 ± 0.51               | 4.43 ± 1.08                | 3.20 ± 0.61                 | 7.53 ± 1.29                    | 2.04 ± 0.81                   |
| <b>Intestine</b>          | 1.96 ± 0.32               | 2.40 ± 0.99                | 1.94 ± 0.14                 | 2.25 ± 0.64                    | 1.51 ± 1.01                   |
| <b>Salivary<br/>Gland</b> | 2.90 ± 0.67               | 2.97 ± 0.62                | 2.35 ± 0.16                 | 2.68 ± 0.46                    | 1.97 ± 0.50                   |

Mean ± SD values are reported as standardized uptake value (SUV)

SUPPLEMENTARY DATA

**Supplementary Table S5.** *In vivo* PET and *ex vivo* biodistribution data in C57BL/6J and obese (*ob/ob*) mice one-hour after intravenous administration of  $^{52}\text{Mn}^{2+}$ . n = 3.

| <b>Organs</b>             | <b><i>In vivo</i><br/>PET Data</b> |                       | <b>Organs</b>             | <b><i>Ex vivo</i><br/>biodistribution</b> |                       |
|---------------------------|------------------------------------|-----------------------|---------------------------|-------------------------------------------|-----------------------|
|                           | C57BL/6J<br>(n=3)                  | <i>Ob/Ob</i><br>(n=3) |                           | C57BL/6J<br>(n=3)                         | <i>Ob/Ob</i><br>(n=3) |
| <b>Heart/blood</b>        | 1.93 ± 0.10                        | 3.32 ± 0.13           | <b>Heart</b>              | 3.68 ± 0.15                               | 5.93 ± 0.69           |
| <b>Liver</b>              | 3.40 ± 0.73                        | 3.68 ± 0.25           | <b>Liver</b>              | 3.33 ± 0.29                               | 3.63 ± 0.10           |
| <b>Kidneys</b>            | 5.08 ± 0.37                        | 9.43 ± 0.44           | <b>Kidneys</b>            | 5.58 ± 0.16                               | 13.94 ±<br>1.91       |
| <b>Muscle</b>             | 0.38 ± 0.06                        | 0.26 ± 0.09           | <b>Spleen</b>             | 1.74 ± 0.46                               | 2.65 ± 0.27           |
| <b>Pancreas</b>           | 4.89 ± 0.68                        | 7.27 ± 1.03           | <b>Pancreas</b>           | 5.19 ± 0.52                               | 9.79 ± 0.83           |
| <b>Salivary<br/>Gland</b> | 2.40 ± 0.20                        | 3.11 ± 1.05           | <b>Intestine</b>          | 1.72 ± 0.33                               | 4.17 ± 0.21           |
|                           |                                    |                       | <b>Salivary<br/>Gland</b> | 3.18 ± 0.49                               | 4.57 ± 0.95           |

Mean ± SD values are reported as standardized uptake value (SUV)

SUPPLEMENTARY DATA

**Supplementary Table S6.** Quantitative results of longitudinal PET imaging studies in ICR mice administered a  $^{52}\text{Mn}^{2+}$  intravenous bolus (n = 4)

| Time<br>(days) | Organ/tissue uptake |              |              |             |              |              |
|----------------|---------------------|--------------|--------------|-------------|--------------|--------------|
|                | Heart/blood         | Liver        | Kidneys      | Muscle      | Pancreas     | S Gland      |
| 0.042          | 7.50 ± 0.61         | 11.63 ± 1.12 | 18.30 ± 0.53 | 1.37 ± 0.12 | 18.30 ± 1.71 | 8.20 ± 0.92  |
| 0.125          | 6.70 ± 0.62         | 12.00 ± 1.41 | 18.57 ± 1.42 | 1.37 ± 0.06 | 18.23 ± 2.21 | 9.00 ± 1.35  |
| 0.5            | 4.30 ± 0.61         | 12.50 ± 0.69 | 17.47 ± 0.21 | 1.27 ± 0.15 | 17.43 ± 0.87 | 9.87 ± 0.49  |
| 1              | 3.33 ± 0.42         | 11.20 ± 0.72 | 16.33 ± 0.72 | 1.17 ± 0.12 | 17.23 ± 0.40 | 9.60 ± 0.30  |
| 3              | 2.83 ± 0.21         | 6.90 ± 0.46  | 11.83 ± 0.45 | 0.96 ± 0.15 | 15.70 ± 1.59 | 10.17 ± 0.38 |
| 5              | 2.57 ± 0.15         | 5.30 ± 0.10  | 9.27 ± 0.25  | 0.93 ± 0.06 | 13.03 ± 1.56 | 11.20 ± 0.85 |
| 7              | 2.47 ± 0.06         | 3.83 ± 0.29  | 7.00 ± 0.87  | 0.73 ± 0.07 | 10.63 ± 1.17 | 10.77 ± 0.71 |
| 9              | 2.30 ± 0.10         | 2.93 ± 0.15  | 5.57 ± 0.84  | 0.64 ± 0.05 | 8.07 ± 0.90  | 9.63 ± 0.32  |
| 11             | 2.07 ± 0.15         | 2.50 ± 0.10  | 4.57 ± 0.61  | 0.66 ± 0.02 | 6.43 ± 0.95  | 9.37 ± 0.55  |
| 13             | 1.93 ± 0.06         | 2.20 ± 0.10  | 4.03 ± 0.31  | 0.66 ± 0.05 | 5.90 ± 1.20  | 8.90 ± 0.26  |

Mean ± SD values are reported as percent injected dose per gram (%ID/g)

SUPPLEMENTARY DATA

**Supplementary Table S7.** Quantitative results of PET imaging in ICR mice 1 h post administration of  $^{52}\text{Mn}^{2+}$  under various conditions to stimulate or inhibit insulin release.

| <b>Organs</b>             | <b>Baseline<br/>(n=3)</b> | <b>Diazoxide<br/>(n=3)</b> | <b>Nifedipine<br/>(n=3)</b> | <b>Glibenclamide<br/>(n=4)</b> | <b>STZ-diabetic<br/>(n=3)</b> |
|---------------------------|---------------------------|----------------------------|-----------------------------|--------------------------------|-------------------------------|
| <b>Heart/blood</b>        | 7.50±0.61                 | 8.27±1.75                  | 10.93±0.76                  | 8.25±1.68                      | 7.63±1.94                     |
| <b>Liver</b>              | 11.63±1.12                | 9.77±0.42                  | 8.53±1.63                   | 10.55±2.39                     | 11.83±8.63                    |
| <b>Kidneys</b>            | 18.30±0.53                | 14.53±3.27                 | 14.73±0.99                  | 18.73±2.65                     | 14.80±3.82                    |
| <b>Muscle</b>             | 1.37±0.12                 | 1.29±0.37                  | 1.83±0.15                   | 1.45±0.10                      | 0.86±0.14                     |
| <b>Pancreas</b>           | 18.30±1.71                | 9.03±2.74                  | 9.87±2.42                   | 21.28±2.43                     | 7.70±2.49                     |
| <b>Salivary<br/>Gland</b> | 8.20±0.92                 | 7.97±3.69                  | 9.03±1.10                   | 7.48±0.29                      | 5.53±3.20                     |

Mean ± SD values are reported as standardized uptake value (%ID/g)

SUPPLEMENTARY DATA

**Supplementary Table S8.** One-hour post injection *ex vivo* biodistribution data in ICR mice administered  $^{52}\text{Mn}^{2+}$  under various conditions to stimulate or inhibit insulin release.

| <b>Organs</b>             | <b>Baseline<br/>(n=3)</b> | <b>Diazoxide<br/>(n=3)</b> | <b>Nifedipine<br/>(n=3)</b> | <b>Glibenclamide<br/>(n=4)</b> | <b>STZ diabetic<br/>(n=3)</b> |
|---------------------------|---------------------------|----------------------------|-----------------------------|--------------------------------|-------------------------------|
| <b>Heart</b>              | 13.10±1.90                | 15.85±3.02                 | 22.72±3.12                  | 17.46±3.10                     | 15.13±3.33                    |
| <b>Liver</b>              | 8.01±0.33                 | 9.87±1.62                  | 7.63±1.24                   | 10.79±2.22                     | 15.11±11.18                   |
| <b>Kidneys</b>            | 30.77±4.67                | 19.92±6.50                 | 19.04±3.15                  | 26.85±3.34                     | 22.85±6.62                    |
| <b>Spleen</b>             | 5.85±0.69                 | 5.42±0.94                  | 2.18±0.42                   | 5.52±0.85                      | 3.39±1.36                     |
| <b>Pancreas</b>           | 21.62±2.49                | 14.03±3.27                 | 13.33±1.64                  | 24.85±2.05                     | 10.14±3.92                    |
| <b>Intestine</b>          | 9.23±0.74                 | 7.44±2.56                  | 8.17±0.69                   | 7.55±2.58                      | 8.33±4.19                     |
| <b>Salivary<br/>Gland</b> | 10.03±1.78                | 8.81±3.80                  | 9.86±0.83                   | 8.85±0.63                      | 7.11±4.45                     |

Mean ± SD values are reported as percent injected dose per gram (%ID/g)

SUPPLEMENTARY DATA

**Supplementary Table S9.** *In vivo* PET and *ex vivo* biodistribution data in C57BL/6J and obese (*ob/ob*) mice one-hour after intravenous administration of  $^{52}\text{Mn}^{2+}$ . n = 3.

| <b>Organs</b>             | <b><i>In vivo</i><br/>PET Data</b> |                       | <b>Organs</b>             | <b><i>Ex vivo</i><br/>biodistribution</b> |                       |
|---------------------------|------------------------------------|-----------------------|---------------------------|-------------------------------------------|-----------------------|
|                           | C57BL/6J<br>(n=3)                  | <i>Ob/Ob</i><br>(n=3) |                           | C57BL/6J<br>(n=3)                         | <i>Ob/Ob</i><br>(n=3) |
| <b>Heart/blood</b>        | 8.57±0.60                          | 7.33±0.50             | <b>Heart</b>              | 16.36±0.74                                | 13.10±1.90            |
| <b>Liver</b>              | 15.07±2.97                         | 8.10±0.36             | <b>Liver</b>              | 14.75±1.01                                | 8.01±0.33             |
| <b>Kidneys</b>            | 22.53±1.31                         | 20.80±1.61            | <b>Kidneys</b>            | 24.79±1.13                                | 30.77±4.67            |
| <b>Muscle</b>             | 1.70±0.30                          | 0.58±0.20             | <b>Spleen</b>             | 7.72±1.95                                 | 5.85±0.69             |
| <b>Pancreas</b>           | 21.70±2.86                         | 16.07±2.67            | <b>Pancreas</b>           | 23.03±1.94                                | 21.62±2.49            |
| <b>Salivary<br/>Gland</b> | 10.63±0.91                         | 6.80±2.08             | <b>Intestine</b>          | 7.62±1.42                                 | 9.23±0.74             |
|                           |                                    |                       | <b>Salivary<br/>Gland</b> | 14.12±2.35                                | 10.01±1.78            |

Mean ± SD values are reported as standardized uptake value (%ID/g)



## SUPPLEMENTARY DATA

### REFERENCES

1. Graves SA, Hernandez R, Fonslet J, England CG, Valdovinos HF, Ellison PA, Barnhart TE, Elema DR, Theuer CP, Cai W: Novel Preparation Methods of <sup>52</sup>Mn for ImmunopET Imaging. *Bioconjug Chem* 2015;26:2118-2124
2. Lewis CM, Graves SA, Hernandez R, Valdovinos HF, Barnhart TE, Cai W, Meyerand ME, Nickles RJ, Suzuki M: <sup>52</sup>Mn production for PET/MRI tracking of human stem cells expressing divalent metal transporter 1 (DMT1). *Theranostics* 2015;5:227
3. Gregg T, Poudel C, Schmidt BA, Dhillon RS, Sdao SM, Truchan NA, Baar EL, Fernandez LA, Denu JM, Eliceiri KW, Rogers JD, Kimple ME, Lamming DW, Merrins MJ: Pancreatic beta-Cells From Mice Offset Age-Associated Mitochondrial Deficiency With Reduced KATP Channel Activity. *Diabetes* 2016;65:2700-2710
4. Brill AL, Wisinski JA, Cadena MT, Thompson MF, Fenske RJ, Brar HK, Schaid MD, Pasker RL, Kimple ME: Synergy Between Galphaz Deficiency and GLP-1 Analog Treatment in Preserving Functional beta-Cell Mass in Experimental Diabetes. *Mol Endocrinol* 2016;30:543-556
